# Supplementary material for: Identifying hexagonal 2D planar electrocatalysts with strong OCHO* binding for selective CO2 reduction
Source: Royal Society of Chemistry journal article supplement (doi:10.1039/d3ta04714h), 2023-01-01
Supplement: d3ta04714h1.pdf [file d3ta04714h1.pdf]

## Supporting Information

### Identifying Hexagonal 2D Planar Electrocatalysts with Strong OCHO\* Binding for Selective CO<sub>2</sub> Reduction

Yuefeng Zhang <sup>1</sup>, Tianyi Wang <sup>3</sup>, Fei Wang <sup>4</sup>, Huiling Zheng <sup>5</sup>, Zhiyuan Zeng <sup>1,2\*</sup>, and  
Hao Li <sup>3\*</sup>

<sup>1</sup> Department of Materials Science and Engineering, and State Key Laboratory of Marine Pollution, City University of Hong Kong, 83 Tat Chee Avenue, Kowloon, Hong Kong 999077, China.

<sup>2</sup> Shenzhen Research Institute, City University of Hong Kong, Shenzhen 518057, China

<sup>3</sup> Advanced Institute for Materials Research (WPI-AIMR), Tohoku University, Sendai 980-8577, Japan.

<sup>4</sup> Key Laboratory of Special Functional Materials for Ecological Environment and Information (Hebei University of Technology), Ministry of Education, Tianjin, 300130, China

<sup>5</sup> State Key Laboratory of Clean and Efficient Coal Utilization, Taiyuan University of Technology, Taiyuan 030024, China

\* Correspondence should be addressed to:

[zhiyzeng@cityu.edu.hk](mailto:zhiyzeng@cityu.edu.hk) (Z.Z.)

[li.hao.b8@tohoku.ac.jp](mailto:li.hao.b8@tohoku.ac.jp) (H.L.)

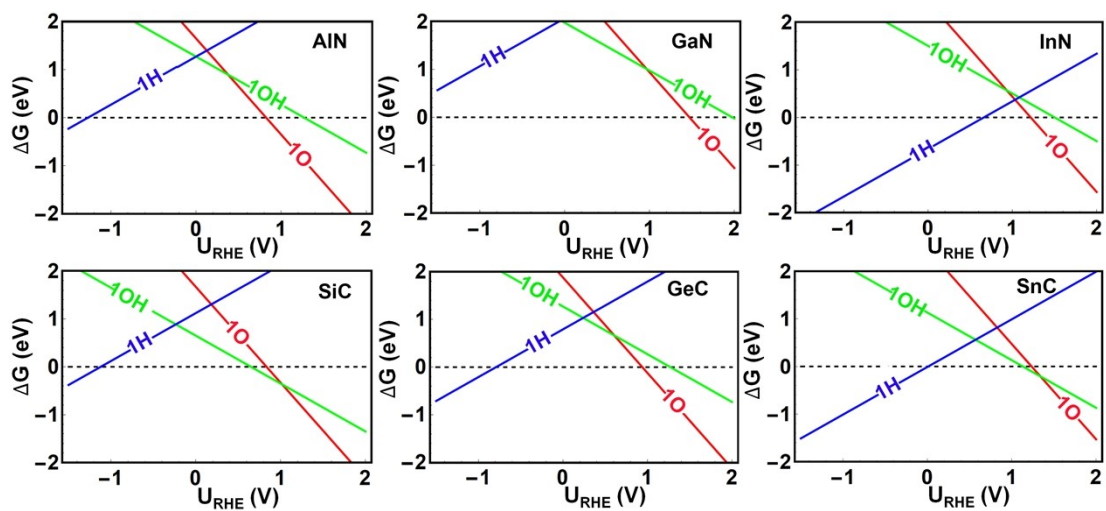

**Fig. S1.** The calculated 1D Pourbaix diagrams of the 2D monolayer systems at pH = 0.

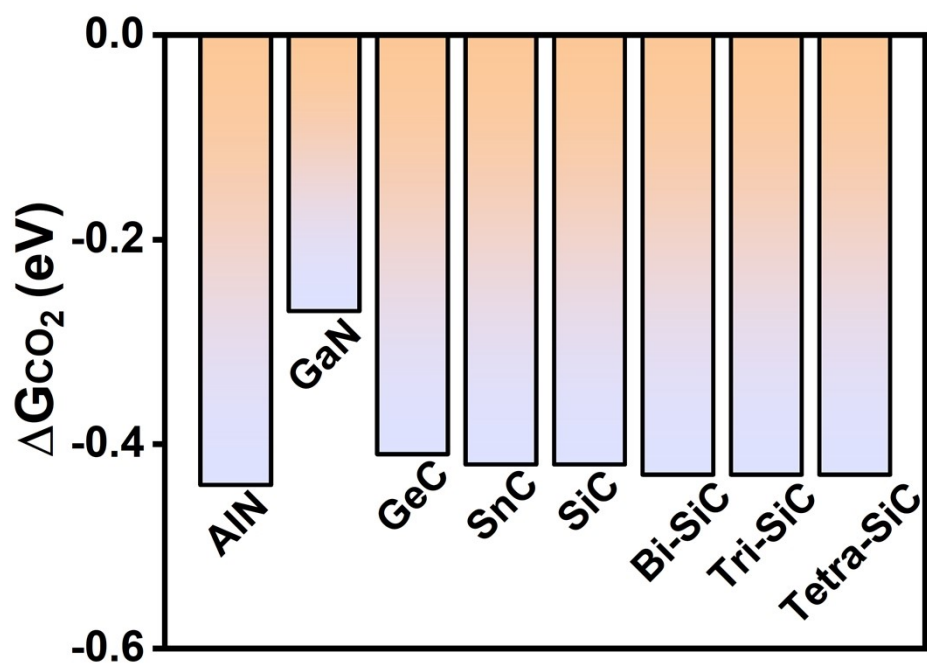

**Fig. S2.** Gibbs free energies of CO<sub>2</sub> adsorption at the 2D catalysts.

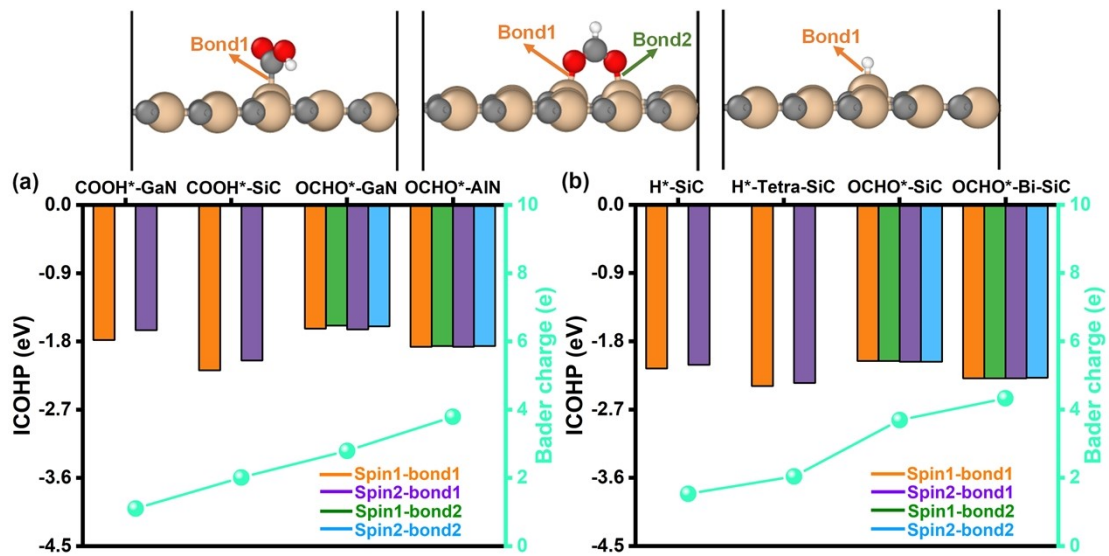

**Fig. S3.** The integrated crystal orbital Hamilton population (ICOHP) and charge variation for (a) COOH\* on GaN and SiC, and OCHO\* on GaN and AlN; (b) H\* on SiC and Tetra-SiC and OCHO\* on SiC and Bi-SiC, where positive values represent electrons lost.

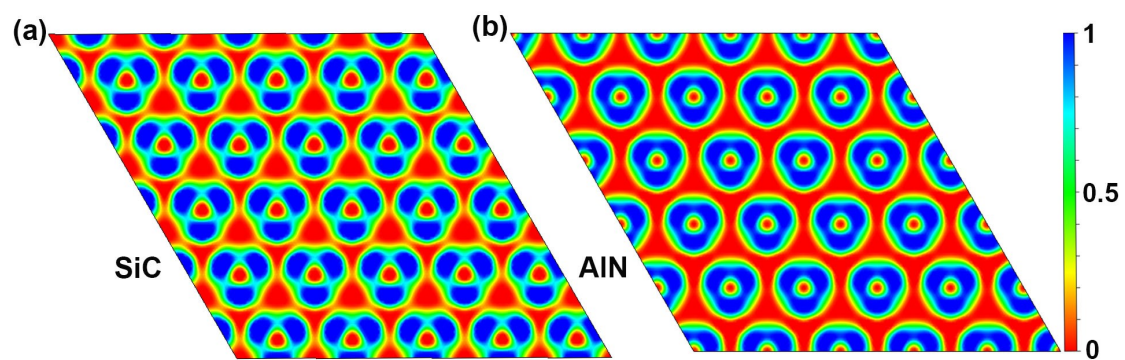

**Fig. S4.** Electron localization functions of (a) SiC and (b) AlN.

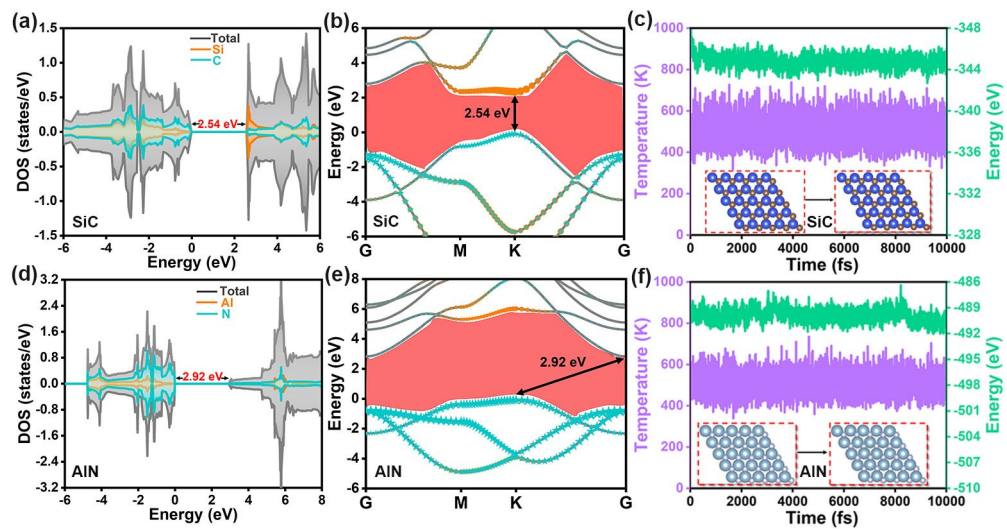

**Fig. S5.** Projected density of states of (a) SiC and (d) AlN. Projected band structure of (b) SiC and (e) AlN. *Ab initio* molecular dynamics (AIMD) simulations under 500 K at (c) SiC and (f) AlN.

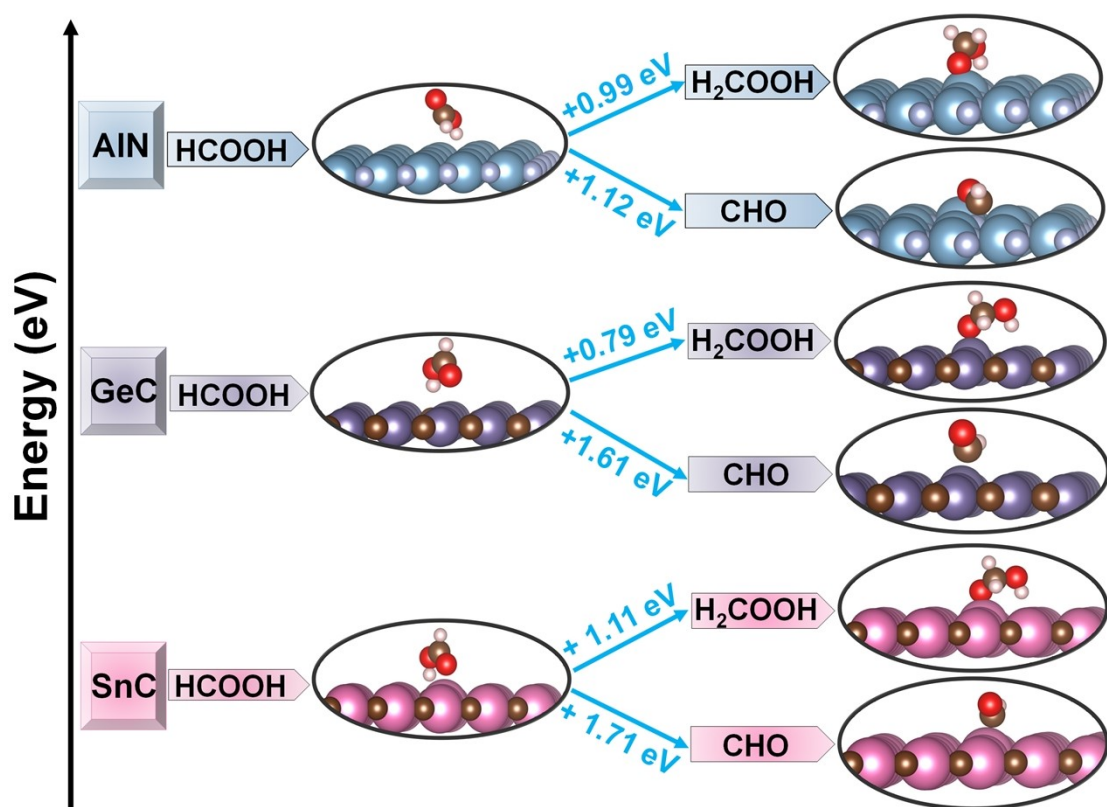

**Fig. S6.** Free energy profiles of the further protonation of HCOOH\* and the optimized geometric structures of AlN, GeC, and SnC. Al, Ge, Sn, H, O, C, and N are denoted by sky blue, dark purple, bright pink, light pink, red, gray, and light blue spheres, respectively.

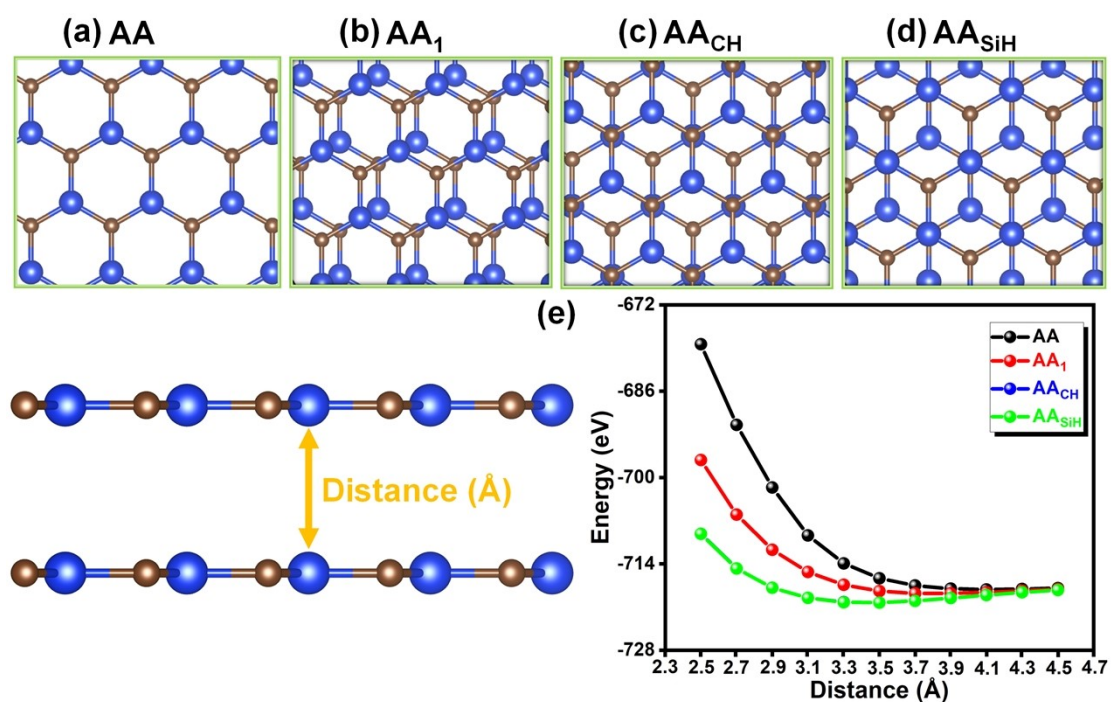

**Fig. S7** Possible stacking modes of the bi-SiC model: (a) AA, (b) AA<sub>1</sub>, (c) AA<sub>CH</sub>, and (d) AA<sub>SiH</sub>. (e) Single point energy as a function of interlayer distance for bi-SiC. Si and C elements are presented by blue and gray balls, respectively.

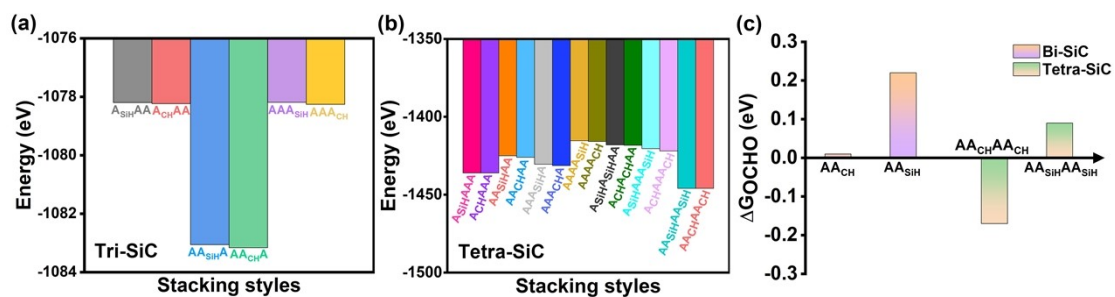

**Fig. S8** Variation of single point energies brought about by the various stacking styles of (a) tri-SiC and (b) tetra-SiC models. (c) Gibbs free energies of OCHO\* adsorption on AA<sub>CH</sub>, AA<sub>SiH</sub>, AA<sub>CH</sub>AA<sub>CH</sub>, and AA<sub>SiH</sub>AA<sub>SiH</sub>.

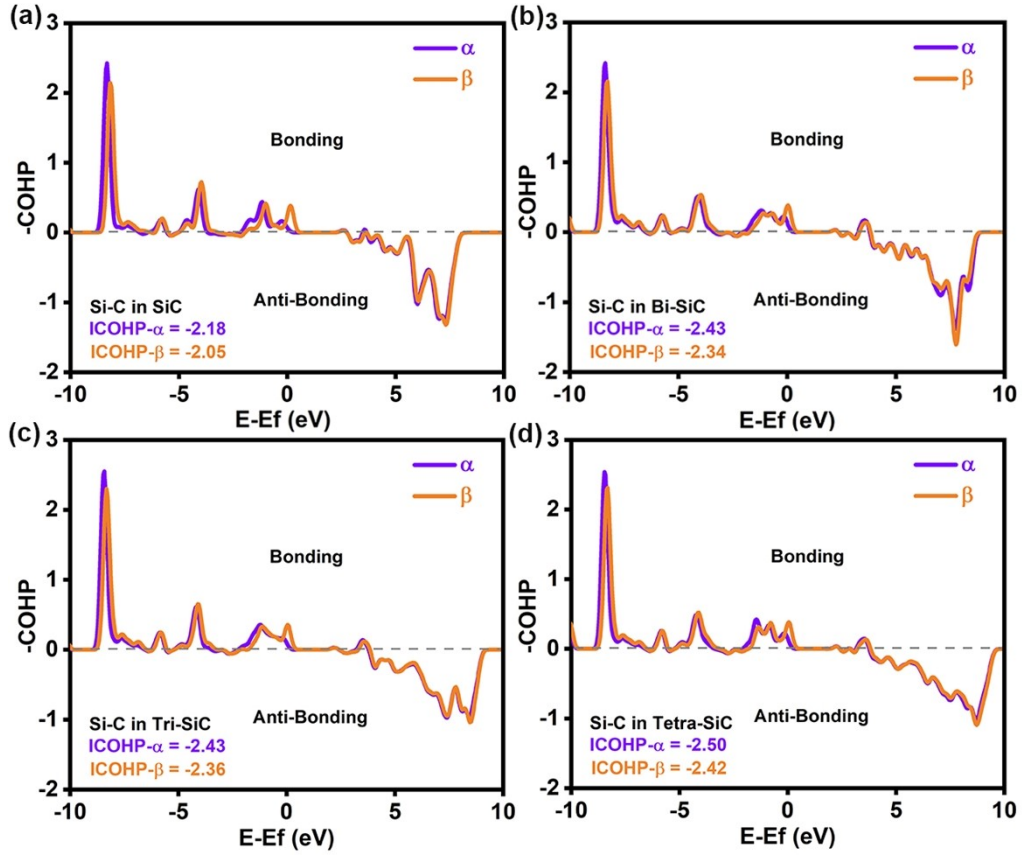

**Fig. S9.** COHP for the C in COOH\* bonded to the SiC (a), Bi-SiC (b), Tri-SiC (c), Tetra-SiC (d). The bonding and antibonding states are shown on the up and the down of the horizontal zero line.  $\alpha$  and  $\beta$  represent spin up and down, respectively.
